# Supplementary material for: Reaction Time and Visual Memory in Connection to Hazardous Drinking Polygenic Scores in Schizophrenia, Schizoaffective Disorder and Bipolar Disorder
Source: MDPI journal article supplement (doi:10.3390/brainsci11111422), 2021-10-27
Supplement: s1 [file s1]

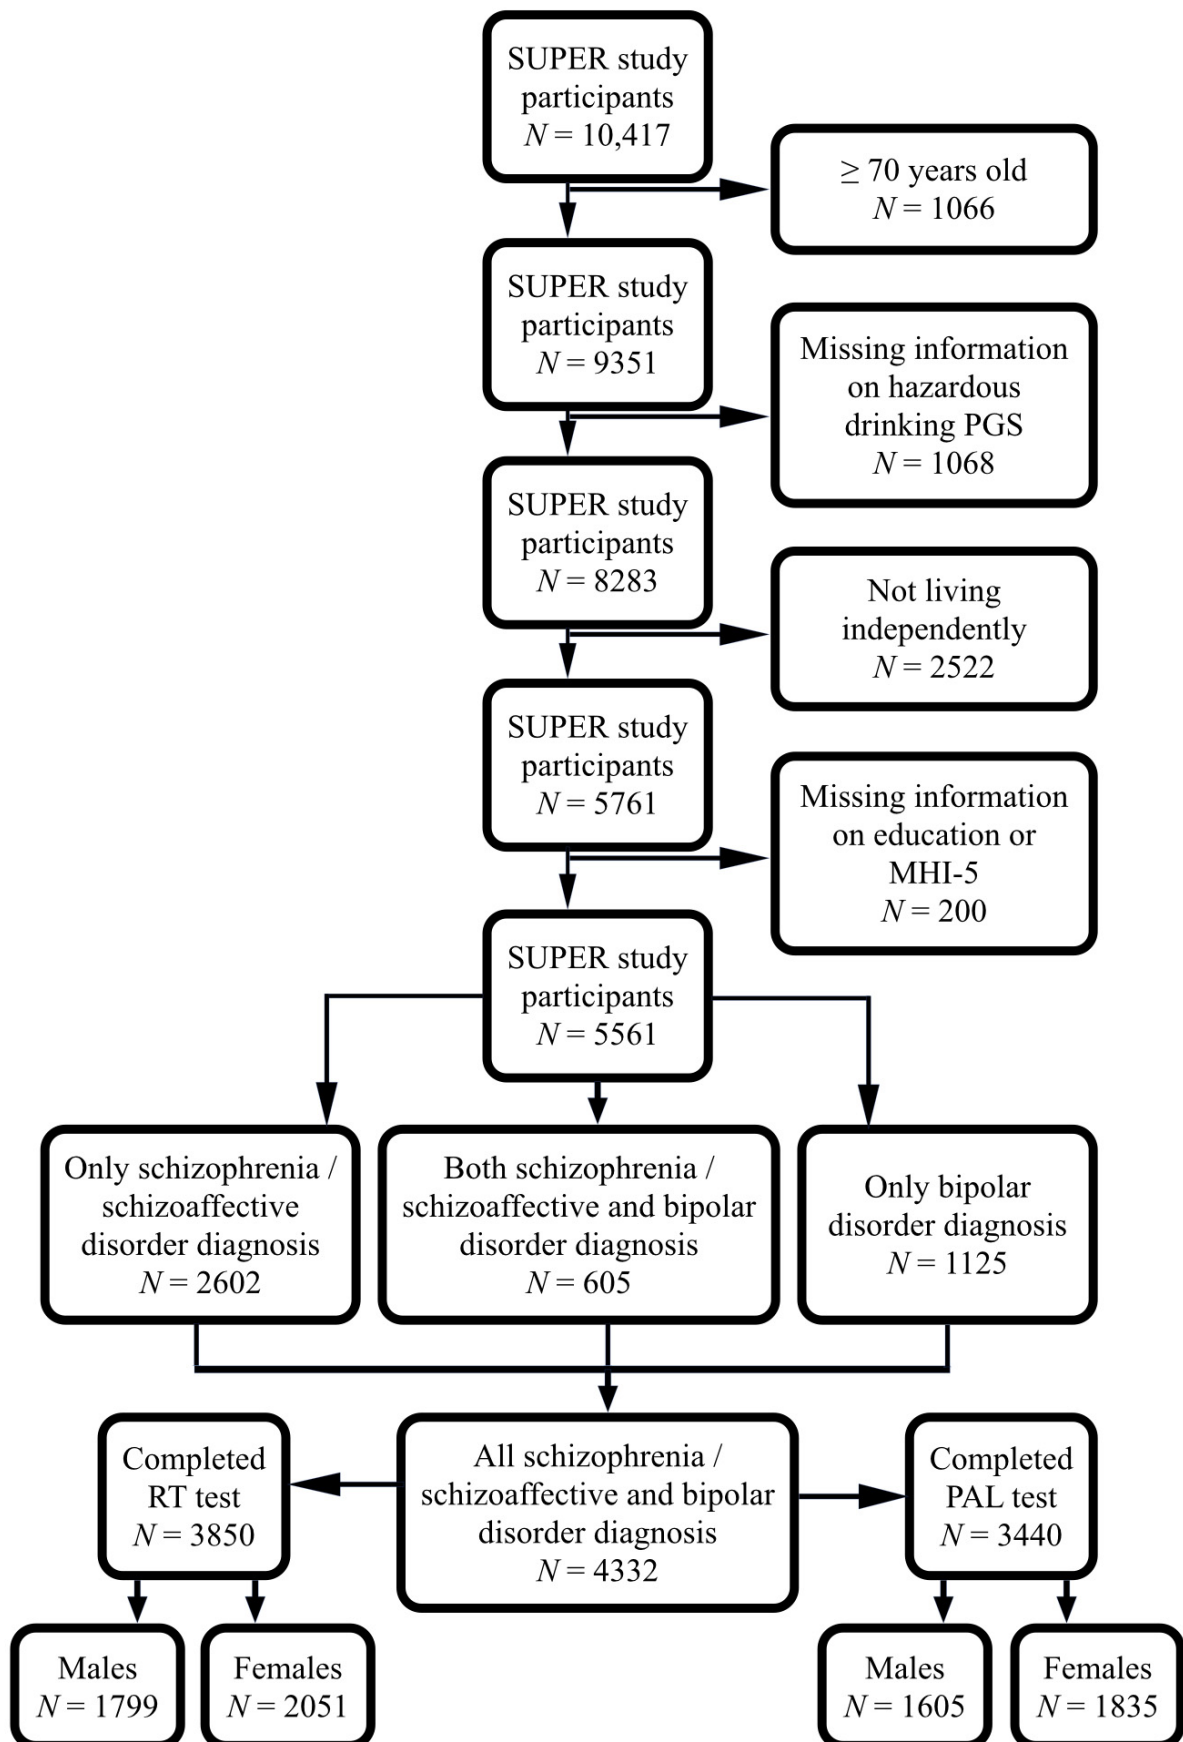

**Supplementary Figure S1.** Flowchart showing the selected study population (combined). SUPER, Suomalainen psykoosisairauksien perinnöllisyysmekanismien tutkimus; MHI-5, mental health inventory-5; RT, reaction time; PAL, paired associative learning.

**Supplementary Figure S2.** Distribution of polygenic scores.

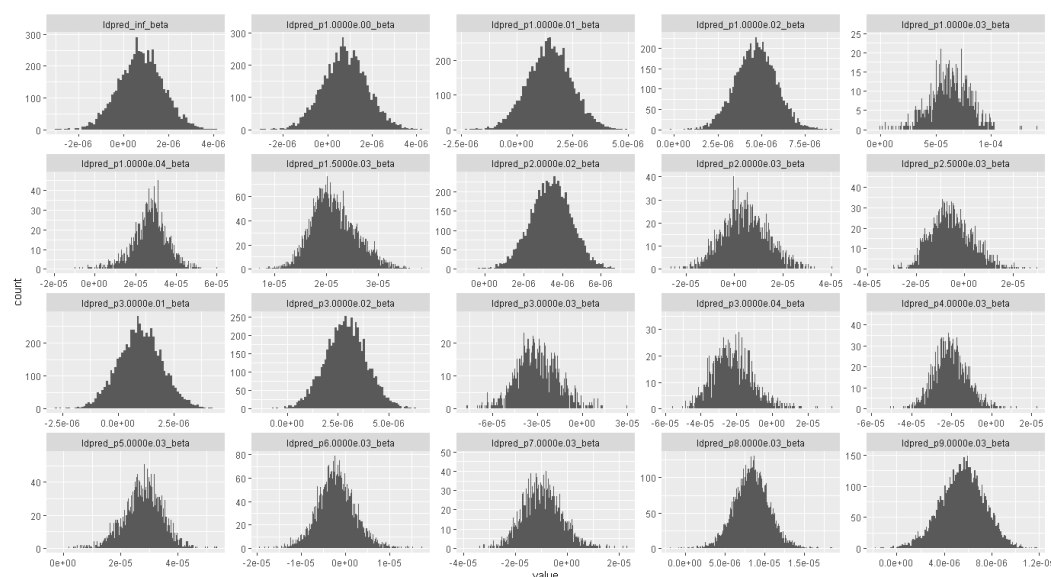

**Supplementary Table S1.** Background factors and hazardous drinking PGS in male and female schizophrenia, schizoaffective and bipolar disorder patients.

|                                              | Male                                             | Female                                            |
|----------------------------------------------|--------------------------------------------------|---------------------------------------------------|
|                                              | N = 2048                                         | N = 2284                                          |
| Age (mean (SD))                              | 44.57 (12.46)                                    | 45.39 (12.64)                                     |
| Age of onset (mean (SD))                     | 26.75 (8.06)                                     | 27.74 (9.38)                                      |
| Completing matriculation examination (%)     | 650 (31.7)                                       | 965 (42.3)                                        |
| Living with spouse (%)                       | 337 (16.5)                                       | 725 (31.7)                                        |
| Having depressive symptoms <sup>Ω</sup> (%)  | 1348 (65.8)                                      | 1557 (68.2)                                       |
| Currently on Psychotropic medications (%)    | 1990 (97.2)                                      | 2218 (97.1)                                       |
| Currently on Antipsychotics (%)              | 1895 (92.5)                                      | 2034 (89.1)                                       |
| Currently on Benzodiazepines (%)             | 510 (24.9)                                       | 621 (27.2)                                        |
| Currently on Antidepressant (%)              | 676 (33.0)                                       | 872 (38.2)                                        |
| Currently on Mood stabilizer (%)             | 502 (24.5)                                       | 615 (26.9)                                        |
| On some other Psychotropics/Missing data (%) | 35 (1.7)                                         | 43 (1.9)                                          |
| Hazardous drinking PGS (Mean (SD))           | 7.92×10 <sup>-07</sup> (9.73×10 <sup>-07</sup> ) | 7.67 ×10 <sup>-07</sup> (9.80×10 <sup>-07</sup> ) |

SD = Standard deviation. <sup>Ω</sup> MHI-5 cutoff score for depression was ≤72.

**Supplementary Table S2.** Association of hazardous drinking PGS with RT test and PAL test in male and female schizophrenia, schizoaffective and bipolar disorder patients.

|          | Male                    |         |                | Female                  |         |                |
|----------|-------------------------|---------|----------------|-------------------------|---------|----------------|
| RT test  | e <sup>β</sup> (95% CI) | p-value | R <sup>2</sup> | e <sup>β</sup> (95% CI) | p-value | R <sup>2</sup> |
| Median   |                         |         |                |                         |         |                |
| Crude    | 0.99 (0.95, 1.03)       | 0.494   | 0.00           | 1.00 (0.96, 1.04)       | 0.941   | 0.00           |
| Adjusted | 0.97 (0.93, 1.01)       | 0.138   | 0.09           | 0.97 (0.93, 1.02)       | 0.262   | 0.09           |
| SD       |                         |         |                |                         |         |                |

|                 |                                    |                |                      |                                    |                |                      |
|-----------------|------------------------------------|----------------|----------------------|------------------------------------|----------------|----------------------|
| Crude           | 1.01 (0.97, 1.06)                  | 0.585          | 0.00                 | 1.00 (0.97, 1.04)                  | 0.800          | 0.00                 |
| Adjusted        | 1.01 (0.97, 1.05)                  | 0.710          | 0.10                 | 0.98 (0.94, 1.03)                  | 0.428          | 0.12                 |
| <b>PAL FTMS</b> | <b><math>\beta</math> (95% CI)</b> | <b>p-value</b> | <b>R<sup>2</sup></b> | <b><math>\beta</math> (95% CI)</b> | <b>p-value</b> | <b>R<sup>2</sup></b> |
| Crude           | 0.01 (-0.04, 0.05)                 | 0.829          | 0.00                 | -0.01 (-0.06, 0.03)                | 0.557          | 0.00                 |
| Adjusted        | 0.02 (-0.03, 0.06)                 | 0.451          | 0.19                 | -0.01 (-0.06, 0.03)                | 0.549          | 0.17                 |
| <b>PAL TEAS</b> | <b>OR (95% CI)</b>                 | <b>p-value</b> | <b>Cohens' D</b>     | <b>OR (95% CI)</b>                 | <b>p-value</b> | <b>Cohens' D</b>     |
| Crude           | 0.96 (0.85, 1.09)                  | 0.554          | 0.04                 | 0.97 (0.87, 1.08)                  | 0.604          | 0.03                 |
| Adjusted        | 0.98 (0.84-1.14)                   | 0.794          |                      | 0.97 (0.84, 1.12)                  | 0.671          |                      |

Adjusted with age, age of onset, education, household pattern and depressive symptoms. R<sup>2</sup>= Effect size measures for (simple and multiple) linear regression models. SD= Standard deviation. OR= Odd ratio. CI= Confidence interval. RT= Reaction time. PAL= Paired association learning. FTMS= First trial memory score. TEAS= Total error adjusted score.
