# Supplementary material for: Reaction Time and Visual Memory in Connection to Hazardous Drinking Polygenic Scores in Schizophrenia, Schizoaffective Disorder and Bipolar Disorder
Source: Brain Sci. 2021 Oct 27;11(11):1422. doi: 10.3390/brainsci11111422 (PMC8615595; doi:10.3390/brainsci11111422)
Supplement: Supplementary file 1 [file brainsci-11-01422-s001.zip › Supplementary spreadsheet S1. Correlation of polygenic scores.xlsx]

## Sheet: Sheet1
	Point-biserial correlation			χ2 test (p-value)
	Audit	Alcohol disorder		Audit	Alcohol disorder
inf_beta	-0.049	-0.081		<.001	<.001
P1
p1.0000e.00_beta	-0.048	-0.079		<.001	<.001
p1.0000e.01_beta	-0.046	-0.079		<.001	<.001
p1.0000e.02_beta	-0.038	-0.076		0.003	<.001
p1.0000e.03_beta	-0.010	-0.021		0.431	0.107
p1.0000e.04_beta	0.008	-0.008		0.512	0.527
p1.5000e.03_beta	-0.017	-0.025		0.197	0.049
P2
p2.0000e.02_beta	-0.042	-0.078		0.001	<.001
p2.0000e.03_beta	-0.001	-0.001		0.956	0.913
p2.5000e.03_beta	0.002	-0.012		0.875	0.366
P3
p3.0000e.01_beta	-0.048	-0.079		<.001	<.001
p3.0000e.02_beta	-0.043	-0.079		0.001	<.001
p3.0000e.03_beta	-0.005	0.002		0.708	0.884
p3.0000e.04_beta	-0.018	-0.029		0.158	0.024
P4
p4.0000e.03_beta	-0.010	-0.020		0.443	0.123
P5
p5.0000e.03_beta	-0.006	-0.022		0.648	0.089
P6
p6.0000e.03_beta	-0.025	-0.039		0.057	0.003
P7
p7.0000e.03_beta	0.007	-0.004		0.575	0.732
P8
p8.0000e.03_beta	-0.029	-0.048		0.026	<.001
P9
p9.0000e.03_beta	-0.026	-0.060		0.041	<.001
